# Supplementary material for: Biodegradation of micropollutant naproxen with a selected fungal strain and identification of metabolites
Source: publisher site journal article supplement (doi:10.1515/znc-2016-0162), 2016-11-10
Supplement: Supplementary file 1 [file znc-2016-0162_Suppl.pdf]

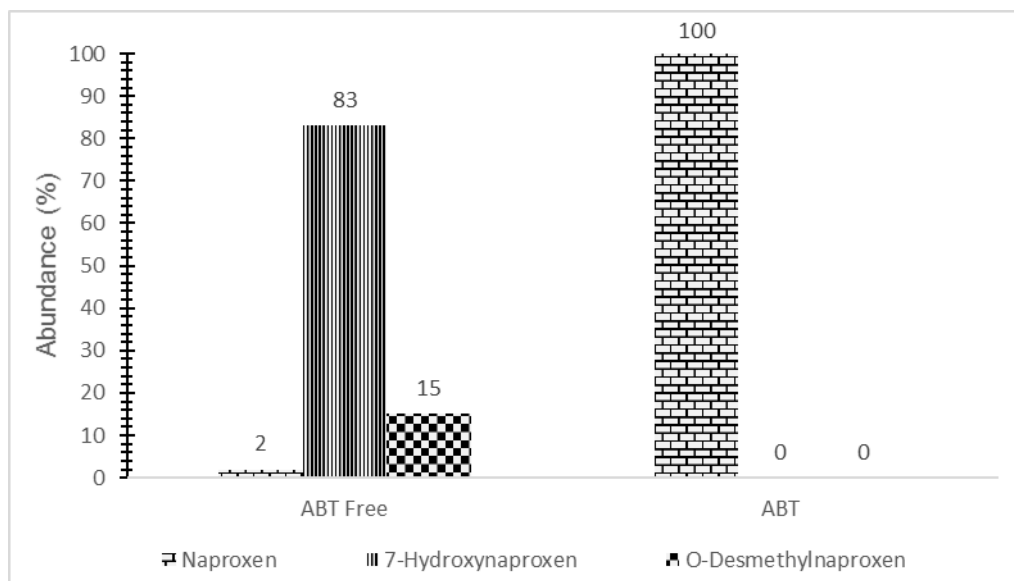

Supplementary Figure. Relative quantities of naproxen and degradation metabolites for 1-Aminobenzotriazole (ABT) containing and ABT free culture mediums in 48h.
